# Supplementary material
Source: publisher figshare collection journal article supplement (https://sage.figshare.com/ndownloader/files/17682527)
Supplement: Supplementary file 1 [file 17682527]

Veterinary Pathology: Supplemental Materials.  
Levi et al. P-Glycoprotein and Breast Cancer Resistance Protein in Canine  
Inflammatory and Non-Inflammatory Grade III Mammary Carcinomas.

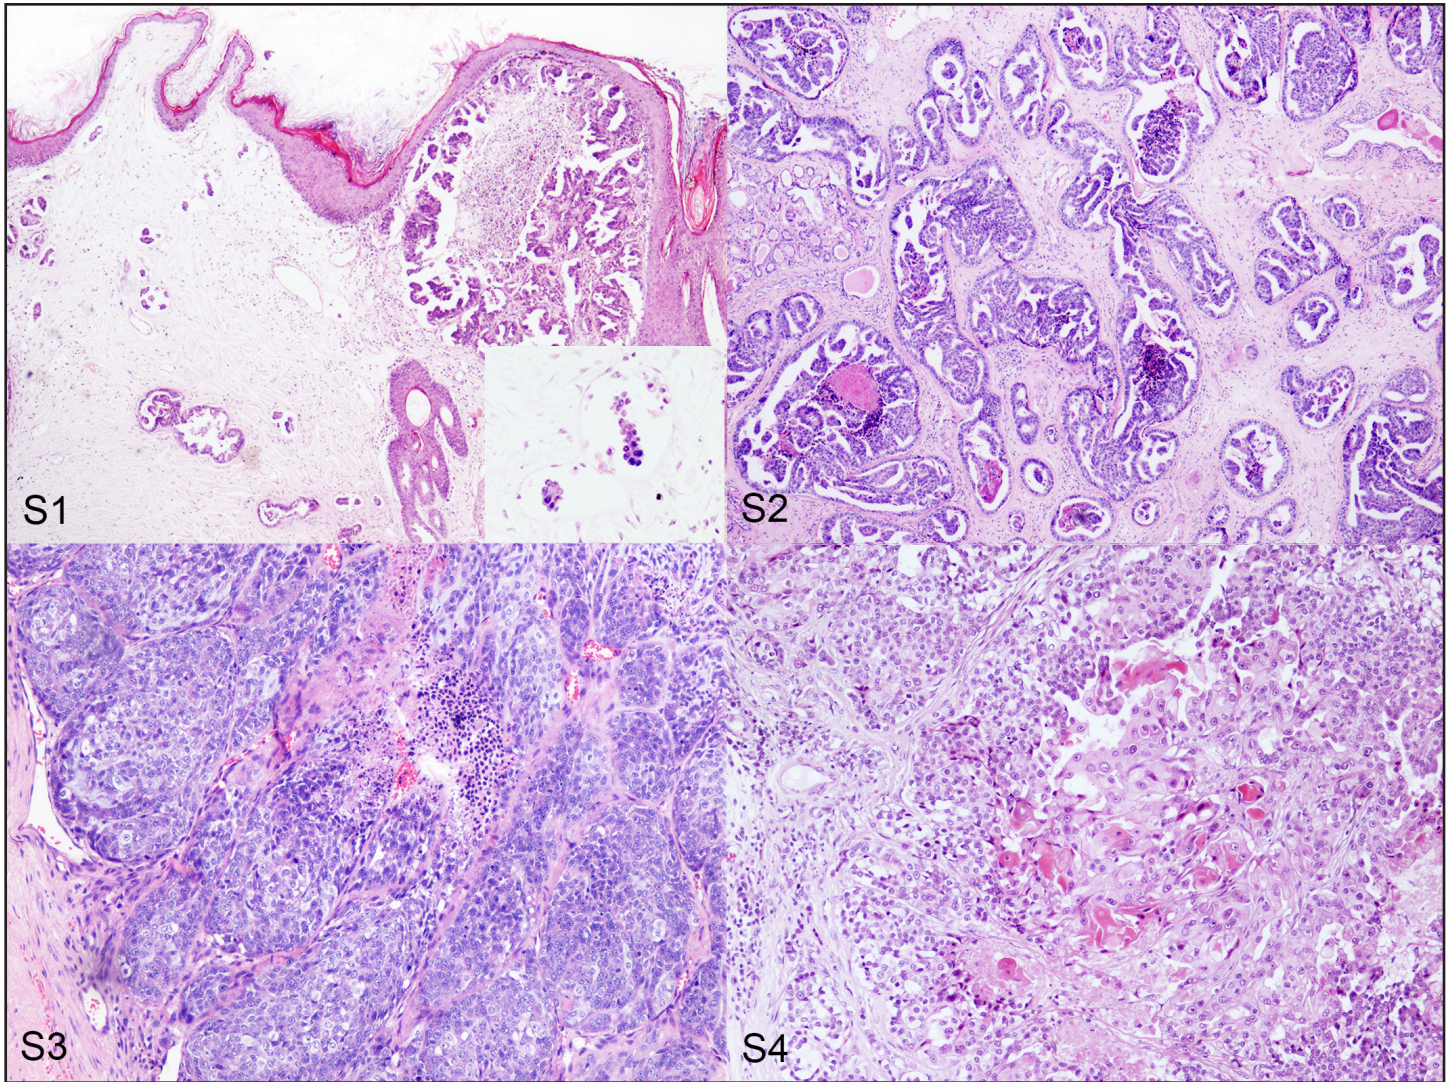

Supplemental Figures S1-S2. Canine inflammatory mammary cancer (IMC), mammary gland, dog. Figure S1. Massive embolization of neoplastic cells in superficial dermal lymphatic vessels (inset at higher magnification), associated with interstitial dermal edema and moderate inflammatory infiltrate. HE. Figure S2. Primary IMC of micropapillary invasive histotype. HE.  
Supplemental Figures S3-S4. Canine non-inflammatory histologic grade III mammary carcinoma, mammary gland, dog. Figure S3. Solid histotype. HE. Figure S4. Adenosquamous histotype. HE.

Veterinary Pathology: Supplemental Materials.  
 Levi et al. P-Glycoprotein and Breast Cancer Resistance Protein in Canine  
 Inflammatory and Non-Inflammatory Grade III Mammary Carcinomas.

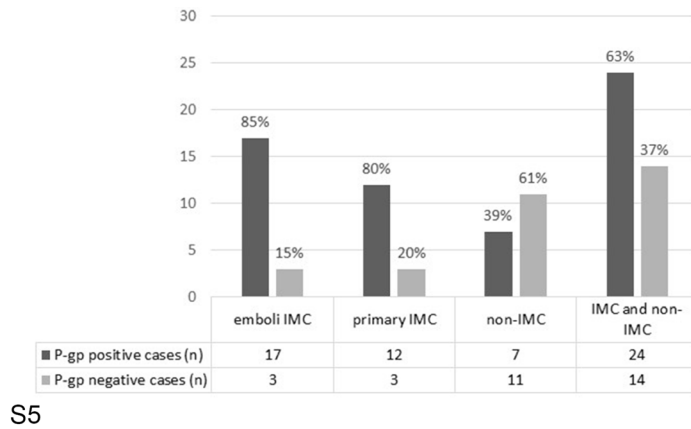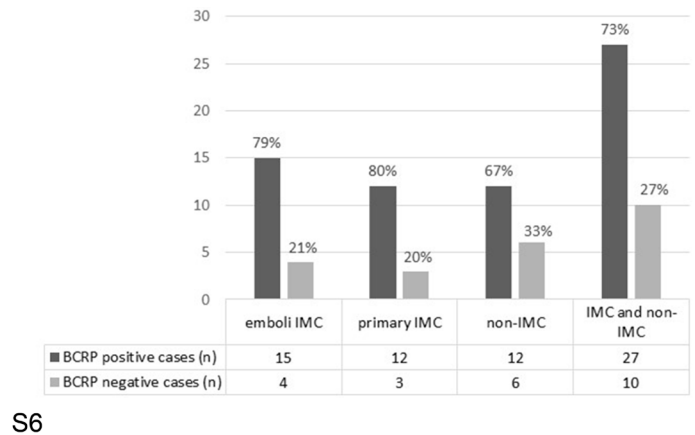

Supplemental Figure S5. P-gp expression in neoplastic emboli (emboli IMC) and primary (primary IMC) tumor of canine inflammatory mammary cancer (IMC), and canine non-inflammatory histologic grade III mammary carcinoma (non-IMC). Emboli of IMC expressed P-gp in 85% of the cases (17/20), and primary IMC expressed P-gp in 80% of the primary IMCs (12/15). Fewer cases of non-IMCs expressed P-gp (7/18, 38.89%).

Supplemental Figure S6. BCRP expression in neoplastic emboli (emboli IMC) and primary (primary IMC) tumor of canine inflammatory mammary cancer (IMC), and canine non-inflammatory histologic grade III mammary carcinoma (non-IMC). BCRP was expressed in 78.95% of IMC emboli (15/19), 80% of primary IMC (12/15) and 66.67% of non-IMC (12/18).



Veterinary Pathology: Supplemental Materials.  
Levi et al. P-Glycoprotein and Breast Cancer Resistance Protein in Canine  
Inflammatory and Non-Inflammatory Grade III Mammary Carcinomas.

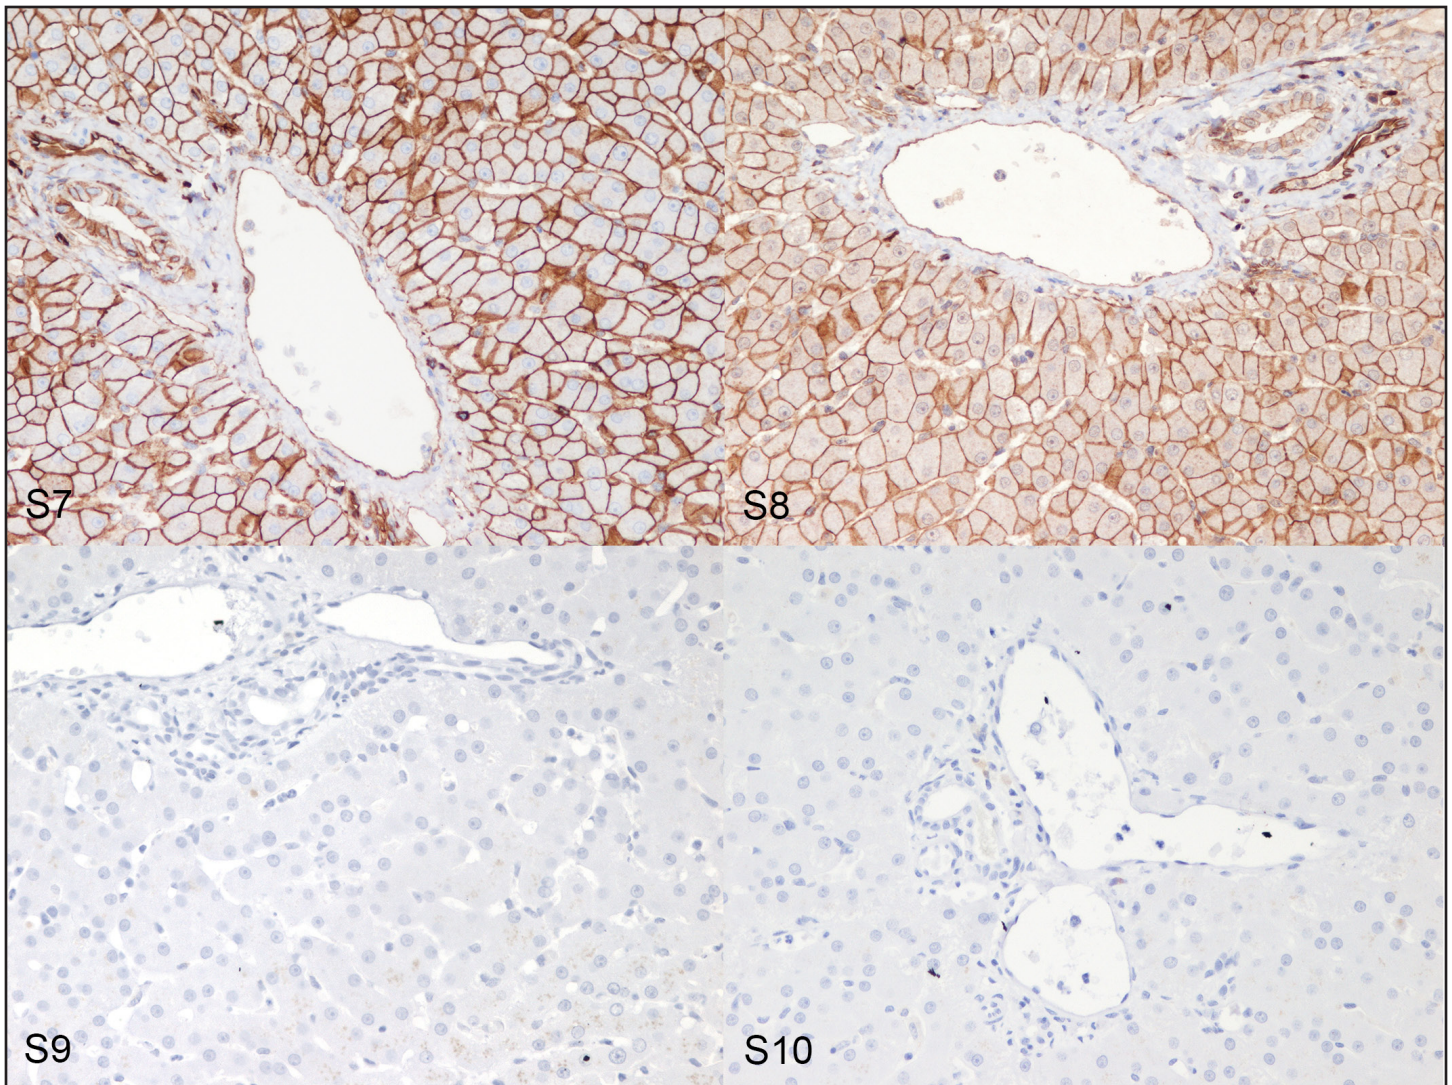

Supplemental Figure S7. Liver, dog. IHC for P-gp. Intense P-gp immunolabelling of the plasma membranes of the hepatocytes, biliary epithelium and endothelial cells of hematic and lymphatic vessels in the positive control.

Supplemental Figure S8. Liver, dog. IHC for BCRP. Intense BCRP immunolabelling of the plasma membranes of the hepatocytes, biliary epithelium and endothelial cells of hematic and lymphatic vessels in the positive control.

Supplemental Figure S9. Liver, dog. IHC. P-gp expression in the negative control. Positive immunolabelling is absent.

Supplemental Figure S10. Liver, dog. IHC. BCRP expression in the negative control. Positive immunolabelling is absent.
